# Supplementary material for: HIV-1 Tat protein exposure alters the morphological characteristics and gene expression in the primary mouse cortex endothelial cells and human brain microvascular endothelial cells
Source: Research Square preprint supplement (doi:10.21203/rs.3.rs-7736511/v1), 2025-10-20
Supplement: Supplementary file 1 [file 830073fb270dcf7874a27bf6.docx]

**HIV-1 Tat protein exposure alters the morphological characteristics and gene expression in the primary mouse cortex endothelial cells and human brain microvascular endothelial cells**

Lili. Quan1, Ichiro Manabe2, Rieko Muramatsu1, Jun Zhu3

1Department of Molecular Pharmacology, National Institute of Neuroscience, National Center of Neurology and Psychiatry, Kodaira, Tokyo, Japan

2Department of System Medicine, Graduate School of Medicine, Chiba University, Chiba, Japan

3Department of Pharmacology and Toxicology, Medical College of Georgia, Augusta University, Augusta, GA. USA.

*Corresponding Author: Jun Zhu

Jun Zhu, M.D., Ph.D.

Department of Pharmacology and Toxicology

Medical College of Georgia, Augusta University

1201 Goss Lane, GE4014, Augusta, GA 30912, USA.

Tel: +1-706-721-8266; Fax: +1-706-721-2347

E-mail: JUZHU@Augusta.edu

| **NAME** | **SIZE** | **ES** | **NES** | **NOM p-val** | **FDR q-val** |
| --- | --- | --- | --- | --- | --- |
| HALLMARK_TGF_BETA_SIGNALING | 53 | -0.45578587 | -1.5201056 | 0.009638554 | 0.049287096 |
| HALLMARK_HEME_METABOLISM | 173 | -0.30805266 | -1.2420908 | 0.06969697 | 0.36454925 |
| HALLMARK_ADIPOGENESIS | 190 | -0.25362986 | -1.0332007 | 0.33636364 | 1 |
| HALLMARK_UV_RESPONSE_UP | 149 | -0.2603737 | -1.0250905 | 0.36716416 | 0.85759866 |
| HALLMARK_DNA_REPAIR | 144 | -0.25152922 | -0.9768236 | 0.51373625 | 0.90580606 |
| HALLMARK_FATTY_ACID_METABOLISM | 146 | -0.24767052 | -0.97045326 | 0.5382263 | 0.7809753 |
| HALLMARK_IL6_JAK_STAT3_SIGNALING | 79 | -0.26128587 | -0.9408868 | 0.5804598 | 0.7805692 |
| HALLMARK_PROTEIN_SECRETION | 93 | -0.25543347 | -0.9338128 | 0.61764705 | 0.7043127 |
| HALLMARK_PANCREAS_BETA_CELLS | 30 | -0.28519017 | -0.8498991 | 0.70709383 | 0.84184325 |
| HALLMARK_E2F_TARGETS | 191 | 0.56845117 | 2.118098 | 0 | 0 |
| HALLMARK_EPITHELIAL_MESENCHYMAL_TRANSITION | 190 | 0.53199935 | 2.00041 | 0 | 0 |
| HALLMARK_NOTCH_SIGNALING | 31 | 0.6581977 | 1.8321842 | 0 | 0.002132344 |
| HALLMARK_G2M_CHECKPOINT | 182 | 0.47431612 | 1.7511547 | 0 | 0.004813041 |
| HALLMARK_MYC_TARGETS_V1 | 184 | 0.44771332 | 1.6735898 | 0 | 0.011019736 |
| HALLMARK_UV_RESPONSE_DN | 139 | 0.44483098 | 1.6041571 | 0.00148368 | 0.02079899 |
| HALLMARK_INFLAMMATORY_RESPONSE | 174 | 0.43316564 | 1.6011221 | 0 | 0.018044638 |
| HALLMARK_REACTIVE_OXYGEN_SPECIES_PATHWAY | 45 | 0.53351396 | 1.5969393 | 0.013114754 | 0.017192898 |
| HALLMARK_APICAL_JUNCTION | 181 | 0.4269992 | 1.593239 | 0 | 0.015945299 |
| HALLMARK_MTORC1_SIGNALING | 189 | 0.41210422 | 1.5256438 | 0.001459854 | 0.029616002 |
| HALLMARK_ANGIOGENESIS | 36 | 0.50482196 | 1.4525588 | 0.05078809 | 0.05580116 |

Supplementary **Table 1**: GSEA of transcriptional profiles in HIV-1 Tat-treated mouse ECs using hallmark gene sets.

Supplementary **Table 2**. GSEA of transcriptional profiles in HIV-1 Tat-treated HBMVECs using hallmark gene sets.

| **NAME** | **SIZE** | **ES** | **NES** | **NOM p-val** | **FDR q-val** |
| --- | --- | --- | --- | --- | --- |
| HALLMARK_MYC_TARGETS_V1 | 195 | -0.7919517 | -3.1884584 | 0 | 0 |
| HALLMARK_MTORC1_SIGNALING | 195 | -0.7069487 | -2.8819785 | 0 | 0 |
| HALLMARK_OXIDATIVE_PHOSPHORYLATION | 198 | -0.6733329 | -2.7520866 | 0 | 0 |
| HALLMARK_E2F_TARGETS | 198 | -0.6128666 | -2.5201468 | 0 | 0 |
| HALLMARK_ANDROGEN_RESPONSE | 93 | -0.627557 | -2.321004 | 0 | 0 |
| HALLMARK_G2M_CHECKPOINT | 195 | -0.561584 | -2.3078687 | 0 | 0 |
| HALLMARK_UNFOLDED_PROTEIN_RESPONSE | 109 | -0.59164935 | -2.2382445 | 0 | 0 |
| HALLMARK_PROTEIN_SECRETION | 94 | -0.571562 | -2.0953379 | 0 | 0 |
| HALLMARK_ADIPOGENESIS | 189 | -0.47453582 | -1.9356928 | 0 | 3.49E-04 |
| HALLMARK_MYC_TARGETS_V2 | 57 | -0.5391993 | -1.8622335 | 0 | 3.14E-04 |
| HALLMARK_INTERFERON_ALPHA_RESPONSE | 96 | 0.49300706 | 1.817489 | 0 | 0.005056562 |
| HALLMARK_INTERFERON_GAMMA_RESPONSE | 183 | 0.41543844 | 1.6572933 | 0 | 0.013671048 |
| HALLMARK_IL6_JAK_STAT3_SIGNALING | 73 | 0.41011056 | 1.4210784 | 0.026515152 | 0.08009998 |
| HALLMARK_HEDGEHOG_SIGNALING | 34 | 0.4653816 | 1.402302 | 0.057142857 | 0.072427355 |
| HALLMARK_NOTCH_SIGNALING | 32 | 0.45210496 | 1.3548026 | 0.102564104 | 0.08608644 |
| HALLMARK_APICAL_SURFACE | 41 | 0.42523932 | 1.3469483 | 0.08669355 | 0.0758974 |
| HALLMARK_KRAS_SIGNALING_DN | 126 | 0.34849265 | 1.3250917 | 0.03250478 | 0.078081034 |
| HALLMARK_WNT_BETA_CATENIN_SIGNALING | 39 | 0.41209066 | 1.2704363 | 0.13737373 | 0.107287206 |
| HALLMARK_HEME_METABOLISM | 178 | 0.3119822 | 1.2437627 | 0.07377049 | 0.11717575 |
| HALLMARK_MYOGENESIS | 165 | 0.30824342 | 1.2093065 | 0.104743086 | 0.13643664 |
